# Supplementary material for: Multinational modelling of PM2.5 and CO exposures from household air pollution in peri-urban Cameroon, Ghana and Kenya
Source: Springer Nature journal article supplement (doi:10.1038/s41598-024-81413-y), 2025-02-26
Supplement: MOESM1 [file 41598_2024_81413_MOESM1_ESM.pdf]

## Supplementary Information

Multinational modelling of PM<sub>2.5</sub> and CO exposures from household air pollution in peri-urban Cameroon, Ghana and Kenya

Harry Williams<sup>1\*</sup>, Miranda Baame<sup>2</sup>, Federico Lorenzetti<sup>1</sup>, Judith Mangeni<sup>3</sup>, Emily Nix<sup>1</sup>, Emmanuel Betang<sup>2</sup>, Ryan Chartier<sup>4</sup>, Edna Sang<sup>3</sup>, Daniel Wilson<sup>5</sup>, Theresa Tawiah<sup>6</sup>, Reginald Quansah<sup>7</sup>, Elisa Puzzolo<sup>1</sup>, Diana Menya<sup>3</sup>, Bertrand Hugo Mbatchou Ngahane<sup>2</sup>, Daniel Pope<sup>1</sup>, Kwaku Poku Asante<sup>6</sup>, Matthew Shupler<sup>1</sup>

1 Department of Public Health, Policy and Systems, University of Liverpool, Liverpool, United Kingdom

2 Douala General Hospital, Douala, Cameroon

3 School of Public Health, Moi University, Eldoret, Kenya

4 RTI International, Research Triangle Park, North Carolina, USA

5 Geocene Inc., Berkeley, California, USA

6 Kintampo Health Research Centre, Kintampo, Ghana

7 School of Public Health, University of Ghana, Ghana

\* Corresponding author: [harrytwilliams1999@gmail.com](mailto:harrytwilliams1999@gmail.com)

**Supplementary Figure S1:** Histogram of Kitchen PM<sub>2.5</sub> concentration (µg/m<sup>3</sup>) **a)** before and **b)** after log-transformation.

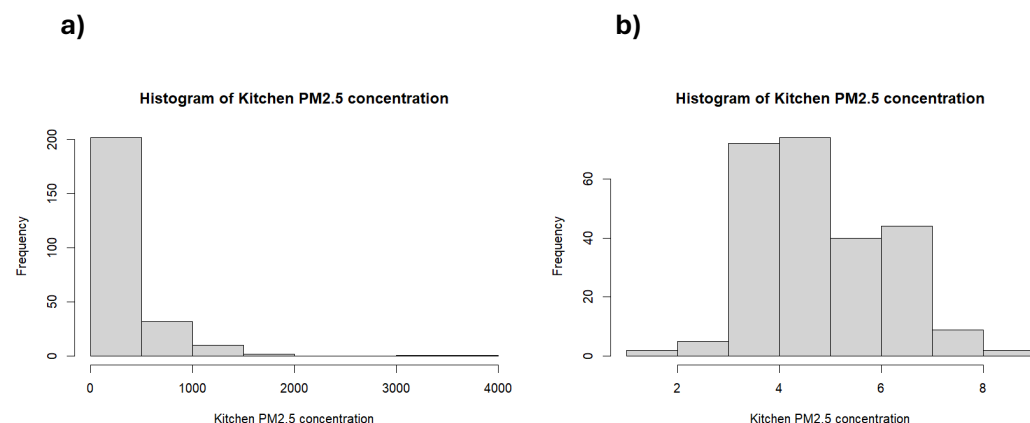

**Supplementary Figure S2:** Histogram of Kitchen CO concentration (ppm) **a)** before and **b)** after log-transformation.

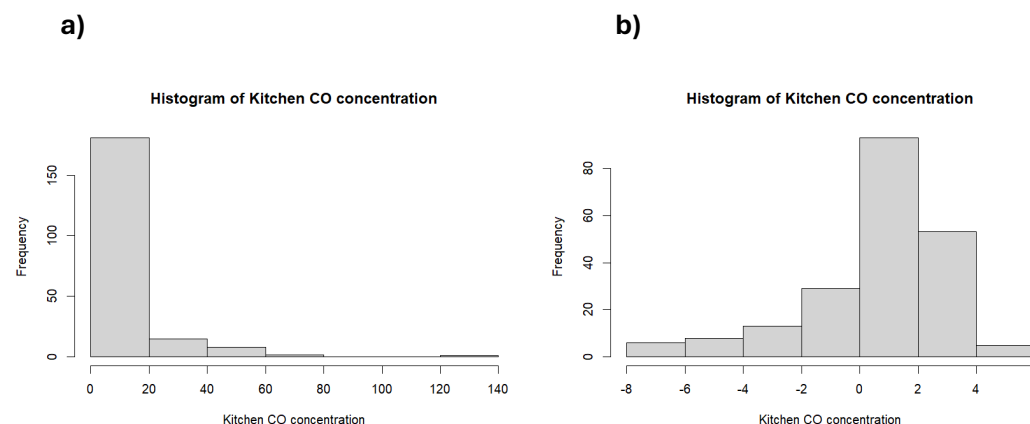

**Supplementary Figure S3:** Histogram of Cook PM<sub>2.5</sub> concentration (µg/m<sup>3</sup>) **a)** before and **b)** after log-transformation.

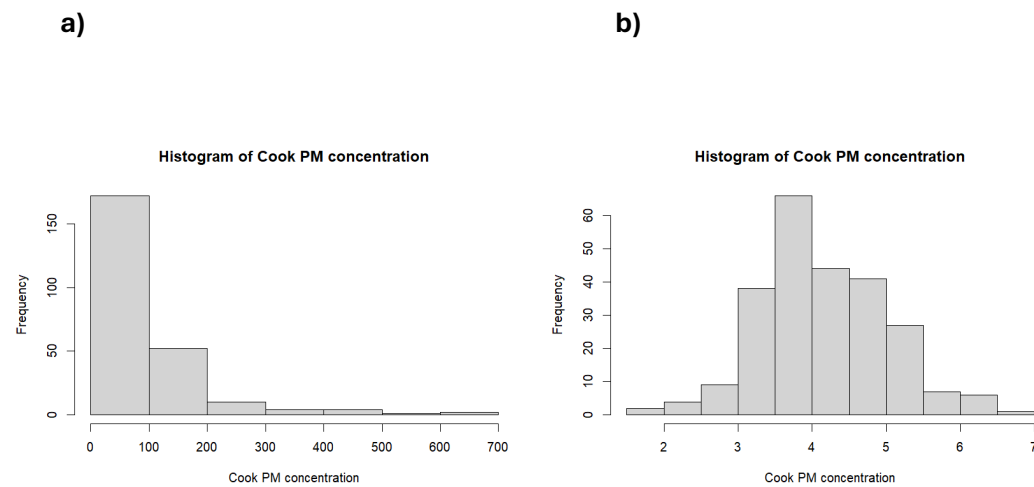

**Supplementary Figure S4:** Histogram of Cook CO concentration (ppm) **a)** before and **b)** after log-transformation.

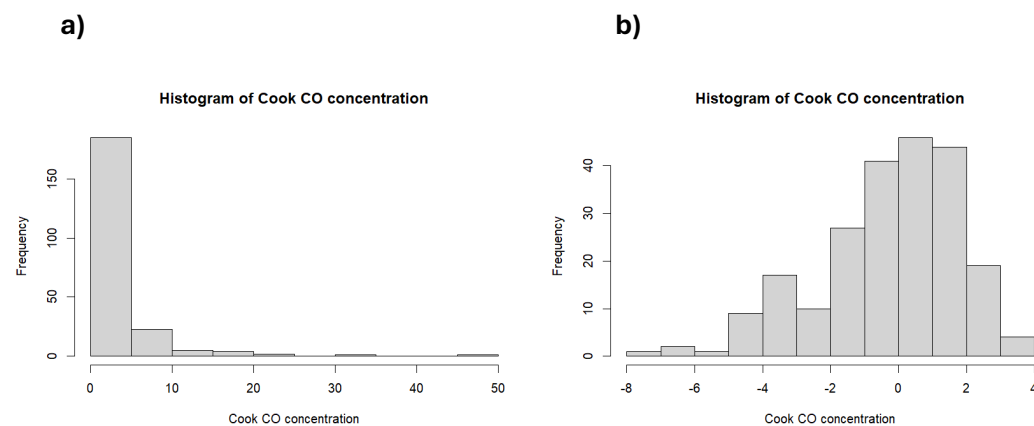

**Supplementary Table S1:** Correlation coefficients of variables included in Kitchen-PM<sub>2.5</sub> modelling

| Variable                            | All communities | Obuasi (Ghana) | Eldoret (Kenya) | Mbalmayo (Cameroon) |
|-------------------------------------|-----------------|----------------|-----------------|---------------------|
| Primary/secondary cooking fuel type | 0.435           | 0.102          | 0.577           | 0.589               |
| Cooking location                    | 0.405           | 0.251          | 0.735           | 0.577               |
| Age                                 | 0.150           | 0.244          | 0.217           | 0.091               |
| Education level                     | 0.181           | 0.231          | 0.310           | 0.190               |
| Household head                      | -0.167          | -0.085         | -0.083          | -0.111              |
| Household size                      | 0.383           | 0.188          | 0.367           | 0.405               |
| Number of rooms                     | -0.182          | -0.018         | 0.061           | -0.206              |
| Number of children under 5          | 0.125           | 0.034          | 0.106           | 0.192               |
| Access to electricity               | 0.124           | 0.080          | 0.285           | -0.328              |
| Own or rent                         | -0.410          | -0.180         | -0.511          | -0.251              |
| Financial security                  | 0.184           | 0.100          | 0.217           | 0.249               |
| <b>*Cooking time from SUMs data</b> |                 |                |                 |                     |
| Cooking time                        | 0.339           | 0.196          | 0.422           | 0.076               |

| <b>*Proxies of ambient air pollution</b> |        |        |        |        |
|------------------------------------------|--------|--------|--------|--------|
| <i>Road proximity</i>                    | -0.056 | -0.209 | -0.176 | -0.122 |
| <i>Times left house</i>                  | 0.051  | 0.062  | 0.213  | -0.027 |

**Supplementary Table S2:** Correlation coefficients of variables included in Kitchen-CO modelling

| <b>Variable</b>                          | <b>All communities</b> | <b>Obuasi (Ghana)</b> | <b>Eldoret (Kenya)</b> | <b>Mbalmayo (Cameroon)</b> |
|------------------------------------------|------------------------|-----------------------|------------------------|----------------------------|
| Primary/secondary cooking fuel type      | 0.360                  | 0.337                 | 0.357                  | 0.299                      |
| Cooking location                         | 0.203                  | 0.206                 | 0.423                  | 0.379                      |
| Age                                      | 0.107                  | 0.168                 | 0.055                  | 0.187                      |
| Education level                          | 0.112                  | 0.121                 | 0.386                  | 0.006                      |
| Household head                           | -0.198                 | -0.080                | -0.380                 | -0.007                     |
| Household size                           | 0.155                  | -0.094                | 0.197                  | 0.158                      |
| Number of rooms                          | -0.169                 | 0.027                 | -0.033                 | -0.144                     |
| Number of children under 5               | 0.110                  | 0.247                 | 0.172                  | 0.008                      |
| Access to electricity                    | 0.131                  | 0.067                 | 0.328                  | -0.244                     |
| Own or rent                              | -0.262                 | 0.017                 | -0.398                 | -0.189                     |
| Financial security                       | 0.062                  | -0.122                | 0.309                  | 0.085                      |
| <b>*Cooking time from SUMs data</b>      |                        |                       |                        |                            |
| Cooking time                             | 0.213                  | 0.028                 | 0.188                  | 0.160                      |
| <b>*Proxies of ambient air pollution</b> |                        |                       |                        |                            |
| <i>Road proximity</i>                    | -0.042                 | -0.117                | -0.133                 | -0.063                     |
| <i>Times left house</i>                  | 0.031                  | 0.094                 | 0.115                  | 0.004                      |

**Supplementary Table S3:** Correlation coefficients of variables included in Cook-PM<sub>2.5</sub> modelling

| <b>Variable</b>                          | <b>All communities</b> | <b>Obuasi (Ghana)</b> | <b>Eldoret (Kenya)</b> | <b>Mbalmayo (Cameroon)</b> |
|------------------------------------------|------------------------|-----------------------|------------------------|----------------------------|
| Primary/secondary cooking fuel type      | 0.381                  | 0.147                 | 0.544                  | 0.466                      |
| Cooking location                         | 0.289                  | 0.237                 | 0.549                  | 0.376                      |
| Age                                      | 0.060                  | -0.088                | 0.155                  | 0.191                      |
| Education level                          | 0.156                  | 0.078                 | 0.344                  | 0.053                      |
| Household size                           | 0.098                  | 0.048                 | 0.361                  | -0.102                     |
| Number of children under 5               | 0.014                  | -0.163                | 0.104                  | -0.033                     |
| Access to electricity                    | 0.139                  | 0.269                 | 0.181                  | -0.066                     |
| Own or rent                              | -0.235                 | 0.052                 | -0.461                 | 0.000                      |
| Financial security                       | 0.180                  | 0.227                 | 0.219                  | 0.241                      |
| Decision maker                           | 0.115                  | 0.040                 | 0.201                  | 0.042                      |
| <b>*Cooking time from SUMs data</b>      |                        |                       |                        |                            |
| Cooking Time                             | 0.187                  | 0.105                 | 0.416                  | -0.029                     |
| <b>*Proxies of ambient air pollution</b> |                        |                       |                        |                            |
| <i>Road proximity</i>                    | -0.085                 | -0.094                | -0.021                 | -0.097                     |
| <i>Times left house</i>                  | 0.158                  | 0.332                 | 0.134                  | 0.061                      |

**Supplementary Table S4:** Correlation coefficients of variables included in Cook-CO modelling

| <b>Variable</b>                     | <b>All communities</b> | <b>Obuasi (Ghana)</b> | <b>Eldoret (Kenya)</b> | <b>Mbalmayo (Cameroon)</b> |
|-------------------------------------|------------------------|-----------------------|------------------------|----------------------------|
| Primary/secondary cooking fuel type | 0.260                  | 0.451                 | 0.166                  | 0.211                      |

|                                          |        |        |        |        |
|------------------------------------------|--------|--------|--------|--------|
| Cooking location                         | 0.127  | 0.335  | 0.182  | 0.239  |
| Education level                          | 0.038  | 0.132  | 0.060  | 0.175  |
| Number of rooms                          | 0.001  | 0.066  | 0.155  | -0.123 |
| Access to electricity                    | -0.071 | -0.096 | 0.023  | -0.212 |
| Own or rent                              | -0.15  | -0.072 | -0.135 | -0.042 |
| Financial security                       | 0.046  | 0.039  | 0.060  | 0.208  |
| Marital status                           | 0.049  | 0.153  | 0.112  | -0.166 |
| Household head                           | -0.058 | -0.067 | -0.049 | 0.167  |
| Decision maker                           | 0.193  | -0.095 | 0.426  | 0.211  |
| <b>*Cooking time from SUMs data</b>      |        |        |        |        |
| Cooking Time                             | 0.258  | 0.222  | 0.472  | 0.013  |
| <b>*Proxies of ambient air pollution</b> |        |        |        |        |
| Road proximity                           | -0.056 | 0.002  | 0.123  | -0.061 |
| Times left house                         | 0.021  | 0.065  | 0.067  | -0.071 |

**Supplementary Table S5:** ANOVA p-value results of categorical variables included in Kitchen-PM<sub>2.5</sub> modelling

| Variable                            | All communities | Obuasi (Ghana) | Eldoret (Kenya) | Mbalmayo (Cameroon) |
|-------------------------------------|-----------------|----------------|-----------------|---------------------|
| Primary/secondary cooking fuel type | 6.74e-13        | 0.379          | 9.06e-10        | 1.75e-08            |
| Cooking location                    | 3.28e-11        | 0.156          | <2e-16          | 4.01e-08            |
| Age                                 | 0.018           | 0.0338         | 0.0342          | 0.432               |
| Education level                     | 0.00427         | 0.0451         | 0.0022          | 0.0976              |
| Household head                      | 0.00851         | 0.466          | 0.422           | 0.336               |
| Household size                      | 4.55e-10        | 0.103          | 0.000253        | 0.000256            |
| Number of rooms                     | 0.00408         | 0.875          | 0.558           | 0.0728              |
| Number of children under 5          | 0.0492          | 0.772          | 0.305           | 0.0943              |
| Access to electricity               | 0.0518          | 0.49           | 0.00513         | 0.00361             |
| Own or rent                         | 6.25e-11        | 0.147          | 1.72e-07        | 0.0286              |
| Financial security                  | 0.0036          | 0.388          | 0.0344          | 0.0289              |

**Supplementary Table S6:** ANOVA p-value results of categorical variables included in Kitchen-CO modelling

| Variable                            | All communities | Obuasi (Ghana) | Eldoret (Kenya) | Mbalmayo (Cameroon) |
|-------------------------------------|-----------------|----------------|-----------------|---------------------|
| Primary/secondary cooking fuel type | 9.91e-08        | 0.0041         | 0.00509         | 0.00861             |
| Cooking location                    | 0.00341         | 0.0855         | 0.000771        | 0.000732            |
| Age                                 | 0.125           | 0.161          | 0.674           | 0.105               |
| Education level                     | 0.108           | 0.314          | 0.0023          | 0.959               |
| Household head                      | 0.00431         | 0.505          | 0.00274         | 0.949               |
| Household size                      | 0.0254          | 0.437          | 0.131           | 0.174               |
| Number of rooms                     | 0.015           | 0.821          | 0.804           | 0.213               |
| Number of children under 5          | 0.116           | 0.0375         | 0.188           | 0.943               |
| Access to electricity               | 0.0593          | 0.581          | 0.0105          | 0.0337              |
| Own or rent                         | 0.000221        | 0.896          | 0.00198         | 0.104               |
| Financial security                  | 0.376           | 0.311          | 0.0162          | 0.464               |

**Supplementary Table S7:** ANOVA p-value results of categorical variables included in Cook-PM<sub>2.5</sub> modelling

| Variable                            | All communities | Obuasi (Ghana) | Eldoret (Kenya) | Mbalmayo (Cameroon) |
|-------------------------------------|-----------------|----------------|-----------------|---------------------|
| Primary/secondary cooking fuel type | 7.05e-10        | 0.212          | 1.21e-08        | 2.25e-05            |
| Cooking location                    | 4.11e-06        | 0.0422         | 8.3e-09         | 0.000824            |
| Age                                 | 0.35            | 0.456          | 0.135           | 0.0987              |
| Education level                     | 0.0233          | 0.506          | 0.000631        | 0.65                |
| Household size                      | 0.128           | 0.685          | 0.000332        | 0.381               |
| Number of children under 5          | 0.826           | 0.166          | 0.315           | 0.778               |
| Access to electricity               | 0.0291          | 0.0206         | 0.0788          | 0.57                |
| Own or rent                         | 0.000289        | 0.685          | 2.91e-06        | 0.997               |
| Financial security                  | 0.00469         | 0.0521         | 0.0327          | 0.036               |
| Decision maker                      | 0.0949          | 0.736          | 0.0796          | 0.743               |

**Supplementary Table S8:** ANOVA p-value results of categorical variables included in Cook-CO modelling

| Variable                            | All communities | Obuasi (Ghana) | Eldoret (Kenya) | Mbalmayo (Cameroon) |
|-------------------------------------|-----------------|----------------|-----------------|---------------------|
| Primary/secondary cooking fuel type | 9.18e-05        | 7.86e-05       | 0.154           | 0.069               |
| Cooking location                    | 0.0587          | 0.00424        | 0.118           | 0.0392              |
| Education level                     | 0.579           | 0.272          | 0.608           | 0.134               |
| Number of rooms                     | 0.991           | 0.582          | 0.183           | 0.291               |
| Access to electricity               | 0.29            | 0.425          | 0.844           | 0.0678              |
| Own or rent                         | 0.0346          | 0.582          | 0.247           | 0.72                |
| Financial security                  | 0.496           | 0.75           | 0.61            | 0.074               |
| Marital status                      | 0.47            | 0.203          | 0.34            | 0.157               |
| Household head                      | 0.389           | 0.579          | 0.677           | 0.152               |
| Decision maker                      | 0.00748         | 0.434          | 0.000844        | 0.1                 |

**Supplementary Table S9:** PM<sub>2.5</sub> kitchen concentration model performance and sensitivity analyses

|                                                                                          | Marginal R <sup>2</sup> | Conditional R <sup>2</sup> | Observations (n) | K-fold cross-validation |      |
|------------------------------------------------------------------------------------------|-------------------------|----------------------------|------------------|-------------------------|------|
|                                                                                          |                         |                            |                  | RMSE                    | MAE  |
| <b>Final model</b>                                                                       | 0.40                    | 0.59                       | 235              | 0.95                    | 0.75 |
| <b>Final model + SUMs data</b><br>(sensitivity analyses)                                 | 0.42                    | 0.57                       | 134              | 0.98                    | 0.78 |
| <b>Final model + proxies of ambient air pollution</b> (sensitivity analyses)             | 0.41                    | 0.59                       | 224              | 0.98                    | 0.77 |
| <b>Final model + SUMs data + proxies of ambient air pollution</b> (sensitivity analyses) | 0.45                    | 0.62                       | 130              | 1.00                    | 0.81 |

**Supplementary Table S10:** CO kitchen concentration model performance and sensitivity analyses

|  | Marginal R <sup>2</sup> | Conditional R <sup>2</sup> | Observations (n) | K-fold cross-validation |     |
|--|-------------------------|----------------------------|------------------|-------------------------|-----|
|  |                         |                            |                  | RMSE                    | MAE |

|                                                                                             |      |      |     |      |      |
|---------------------------------------------------------------------------------------------|------|------|-----|------|------|
| <b>Final model</b>                                                                          | 0.26 | 0.33 | 194 | 2.27 | 1.74 |
| <b>Final model + SUMs data</b><br>(sensitivity analyses)                                    | 0.41 | 0.47 | 122 | 1.96 | 1.51 |
| <b>Final model + proxies of ambient air pollution</b> (sensitivity analyses)                | 0.27 | 0.34 | 189 | 2.32 | 1.81 |
| <b>Final model + SUMs data + proxies of ambient air pollution</b><br>(sensitivity analyses) | 0.42 | 0.47 | 121 | 2.06 | 1.59 |

**Supplementary Table S11:** PM<sub>2.5</sub> cook exposure model performance and sensitivity analyses

|                                                                                             | <b>Marginal<br/>R<sup>2</sup></b> | <b>Conditional<br/>R<sup>2</sup></b> | <b>Observations<br/>(n)</b> | <b>K-fold cross-validation</b> |            |
|---------------------------------------------------------------------------------------------|-----------------------------------|--------------------------------------|-----------------------------|--------------------------------|------------|
|                                                                                             |                                   |                                      |                             | <b>RMSE</b>                    | <b>MAE</b> |
| <b>Final model</b>                                                                          | 0.27                              | 0.31                                 | 201                         | 0.73                           | 0.57       |
| <b>Final model + SUMs data</b><br>(sensitivity analyses)                                    | 0.32                              | 0.38                                 | 98                          | 0.76                           | 0.61       |
| <b>Final model + proxies of ambient air pollution</b> (sensitivity analyses)                | 0.28                              | 0.33                                 | 196                         | 0.77                           | 0.60       |
| <b>Final model + SUMs data + proxies of ambient air pollution</b><br>(sensitivity analyses) | 0.37                              | 0.42                                 | 94                          | 0.80                           | 0.64       |

**Supplementary Table S12:** CO cook exposure model performance and sensitivity analyses

|                                                                                             | <b>Marginal<br/>R<sup>2</sup></b> | <b>Conditional<br/>R<sup>2</sup></b> | <b>Observations<br/>(n)</b> | <b>K-fold cross-validation</b> |            |
|---------------------------------------------------------------------------------------------|-----------------------------------|--------------------------------------|-----------------------------|--------------------------------|------------|
|                                                                                             |                                   |                                      |                             | <b>RMSE</b>                    | <b>MAE</b> |
| <b>Final model</b>                                                                          | 0.14                              | 0.29                                 | 189                         | 2.04                           | 1.54       |
| <b>Final model + SUMs data</b><br>(sensitivity analyses)                                    | 0.16                              | 0.20                                 | 102                         | 2.23                           | 1.79       |
| <b>Final model + proxies of ambient air pollution</b> (sensitivity analyses)                | 0.16                              | 0.28                                 | 181                         | 2.10                           | 1.62       |
| <b>Final model + SUMs data + proxies of ambient air pollution</b><br>(sensitivity analyses) | 0.16                              | 0.19                                 | 100                         | 2.39                           | 1.92       |

**Supplementary Equation S1:**

$$\log(PM_{2.5})_{ij} = B_0 + B_j + B_1(country) + B_2(primary\ secondary\ cooking\ fuel\ type)_i + B_3(Cooking\ location)_i + B_4(Age)_i + B_5(Education\ level)_i + B_6(House\ size)_i +$$

$$B_7(\text{Number of rooms})_i + B_8(\text{Number of children u5})_j + B_9(\text{Access to electricity})_j + B_{10}(\text{Own or rent})_j + B_{11}(\text{Financial security})_j + B_{12}(\text{Household head})_j + e_{ij}$$

Where  $\log(\text{PM}_{2.5})_{ij}$  is the natural logarithm of the mean 48-hour  $\text{PM}_{2.5}$  concentration of the  $i$ th kitchen in community  $j$ ,  $B_0$  is the overall intercept,  $B_j$  is the random effect for community  $j$ ,  $B_i$  is the effect for the  $i$ th individual in community  $j$  and  $e_{ij}$  is the leftover error.

**Supplementary Equation S2:**

$$\log(\text{CO})_{ij} = B_0 + B_j + B_1(\text{country}) + B_2(\text{primary secondary cooking fuel type})_i + B_3(\text{Cooking location})_i + B_4(\text{Age})_i + B_5(\text{Education level})_i + B_6(\text{House size})_i + B_7(\text{Number of rooms})_i + B_8(\text{Number of children u5})_j + B_9(\text{Access to electricity})_j + B_{10}(\text{Own or rent})_j + B_{11}(\text{Financial security})_j + e_{ij}$$

Where  $\log(\text{CO})_{ij}$  is the natural logarithm of the mean 48-hour CO concentration of the  $i$ th kitchen in community  $j$ ,  $B_0$  is the overall intercept,  $B_j$  is the random effect for community  $j$ ,  $B_i$  is the effect for the  $i$ th individual in community  $j$  and  $e_{ij}$  is the leftover error.

**Supplementary Equation S3:**

$$\log(\text{PM}_{2.5})_{ij} = B_0 + B_j + B_1(\text{country}) + B_2(\text{primary secondary cooking fuel type})_i + B_3(\text{Cooking location})_i + B_4(\text{Age})_i + B_5(\text{Education level})_i + B_6(\text{House size})_i + B_7(\text{Number of children u5})_j + B_8(\text{Access to electricity})_j + B_9(\text{Own or rent})_j + B_{10}(\text{Financial security})_j + B_{11}(\text{Decision maker})_j + e_{ij}$$

Where  $\log(\text{PM}_{2.5})_{ij}$  is the natural logarithm of the mean 48-hour  $\text{PM}_{2.5}$  concentration of the  $i$ th individual in community  $j$ ,  $B_0$  is the overall intercept,  $B_j$  is the random effect for community  $j$ ,  $B_i$  is the effect for the  $i$ th individual in community  $j$  and  $e_{ij}$  is the leftover error.

**Supplementary Equation S4:**

$$\log(\text{CO})_{ij} = B_0 + B_j + B_1(\text{country}) + B_2(\text{primary secondary cooking fuel type})_i + B_3(\text{Cooking location})_i + B_4(\text{Education level})_i + B_5(\text{Number of rooms})_j + B_6(\text{Access to electricity})_j + B_7(\text{Financial security})_j + B_8(\text{Household head})_j + B_9(\text{Decision maker})_j + B_{10}(\text{Marital status})_j + e_{ij}$$

Where  $\log(\text{CO})_{ij}$  is the natural logarithm of the mean 48-hour CO concentration of the  $i$ th individual in community  $j$ ,  $B_0$  is the overall intercept,  $B_j$  is the random effect for community  $j$ ,  $B_i$  is the effect for the  $i$ th individual in community  $j$  and  $e_{ij}$  is the leftover error.
